# Supplementary material
Source: Frontiers journal article supplement (https://www.frontiersin.org/articles/383323)
Supplement: Image_1.PDF [file Image_1.PDF]

Figure S1.

|                           |                                                                                                        |      |
|---------------------------|--------------------------------------------------------------------------------------------------------|------|
| GFP-cds PiggyBac          | CGGCGGAGAGGGCACCCTCAAGCAGGGCCGCATGACCAACAAGATGAAGAGCACCAAAGGCGCCCTGACCTTCAGC                           | 2500 |
| GFP-cds Transgenic oyster | .....TAGGGCTGAC.TTCG..CCCTACCTGCTGAGCCACGTGATG                                                         | 38   |
| Consensus                 | g ctgac ttc ccctacctgctgagccacgtgatg                                                                   |      |
| GFP-cds PiggyBac          | GGCTACGGCTTCTACCACTTCGGCACCTACCCAGCGGGTACGAGAACCCTTCTGTCACGCCATCAACAACGGCGGGTACACCAACACCCGCATCGAGA     | 2600 |
| GFP-cds Transgenic oyster | GGCTACGGCTTCTACCACTTCGGCACCTACCCAGCGGGTACGAGAACCCTTCTGTCACGCCATCAACAACGGCGGGTACACCAACACCCGCATCGAGA     | 138  |
| Consensus                 | ggctacggcttctaccacttcggcacctacccagcgggctacgagaacccttctgtcacgccatcaacaacggcgggctacaccaacacccgcacgcgaga  |      |
| GFP-cds PiggyBac          | AGTACGAGGACGGCGGGCTGCTGCACGTGAGCTTCAGCTACCGCTACGAGGCGGGCCGCGTGATCGGCGACTTCAAGGTGGTGGGCACCGGCTTCCCCGA   | 2700 |
| GFP-cds Transgenic oyster | AGTACGAGGACGGCGGGCTGCTGCACGTGAGCTTCAGCTACCGCTACGAGGCGGGCCGCGTGATCGGCGACTTCAAGGTGGTGGGCACCGGCTTCCCCGA   | 238  |
| Consensus                 | agtacgaggacggcggcgctgtgcacgtgagcttcagctaccgctacgaggccggcggcggtgatcggcgacttcaaggtgggtgggcacggcgttccccga |      |
| GFP-cds PiggyBac          | GGACAGCGTGATCTTCACCGACAAGATCATCCGACGCAACGCCACCGTGGAGCACCTGCACCCCATGGGCGATAACGTGCTGGTGGGCAGCTTCGCCCCG   | 2800 |
| GFP-cds Transgenic oyster | GGACAGCGTGATCTTCACCGACAAGATCATCCGACGCAACGCCACCGTGGAGCACCTGCACCCCATGGGCGATAACGTGCTGGTGGGCAGCTTCGCCCCG   | 338  |
| Consensus                 | ggacagcgctgatcttcaccgacaagatcatccgcagcaacgccaccgtggagcacctgcaccccatgggcgataacgtgctggtgggcagcttcgccccg  |      |
| GFP-cds PiggyBac          | ACCTTCAGCCTGCGCGACGGCGGGCTACTACAGCTTCGTGGTGGACAGCCACATGCACCTTCAAGAGCGCCATCCACCCAGCATCCTGCAGAACGGGGGGCC | 2900 |
| GFP-cds Transgenic oyster | ACCTTCAGCCTGCGCGACGGCGGGCTACTACAGCTTCGTGGTGGACAGCCACATGCACCTTCAAGAGCGCCATCCACCCAGCATCCTGCAGAACGGGGGGCC | 438  |
| Consensus                 | accttcagcctgcgcgacggcgggctactacagcttcgtggtggagacccacatgcacttcaagagcgccatccacccagcatcctgcagaaacggggggcc |      |
| GFP-cds PiggyBac          | CCATGTTTCGCCTTCCGCCCGGTGGAGGAGCTGCACAGCAACACCGAGCTGGGCATCGTGGAGTACCAGCACGCCTTCAAGACCCCCATCGCCTTCGCCAG  | 3000 |
| GFP-cds Transgenic oyster | CCATGTTTCGCCTTCCGCCCGGTGGAGGAGCTGCACAGCAACACCGAGCTGGGCATCGTGGAGTACCAGCACGCCTTCAAGACCCCCATCGCCTTCGCCAG  | 538  |
| Consensus                 | ccatgtttcgcttccgcccggtggaggagctgcacagcaacaccgagctgggcatcggtggagtaccagcacgccttcaagacccccatcgcttcgccag   |      |
| GFP-cds PiggyBac          | ATCCCGCGCTCAGTCGTCCAATTCTGCCGTGGACGGCACCGCCGGACCCGGGCTCCACCGGATCTCGCGAGGGCAGAGGAAGTCTTCTAACAATCGGCTGAC | 3100 |
| GFP-cds Transgenic oyster | ATCCCGCGCTCAGTCGTCCAATTCTGCCGTGGACGGCACCGCCGGACCCGGGCTCCACCGGATCTCGCGAGGGCAGAGGAAGTCTTCTAACAATCGGCTGAC | 634  |
| Consensus                 | atcccgcgctcagtcgtccaattctgccgtggacggcacccgcccggacccgggctccaccggatctcgcgagggcagaggaagtcttctaac g gg     |      |
| GFP-cds PiggyBac          | GTGGAGGAGAATCCCGGCCCTATGACCGAGTACAAGCCACGGTGCGCCTCGCCACCCGCGACGACGTCCCGAGGGCCGTACGCACCCCTCGCCGCCGCGT   | 3200 |
| GFP-cds Transgenic oyster | .....                                                                                                  | 634  |
| Consensus                 |                                                                                                        |      |
