# Supplementary material
Source: Frontiers journal article supplement (https://www.frontiersin.org/articles/383323)
Supplement: Image_2.PDF [file Image_2.PDF]

Figure S2.

|                          |                                                                                                       |     |
|--------------------------|-------------------------------------------------------------------------------------------------------|-----|
| GH-cds PiggyBac-gGH      | AGTCGTCCTCCTGCTGTCAGTGTGTCTCTGGGTGTTTCCTCTCAGCCAATCACAGACGGCCAGCGTCTGTTCTCCATCGCCGTCAGCAGAGTTCAACAT   | 200 |
| GH-cds Transgenic oyster | .....CCATTTCGTCAGTGTCTCTGGGTGTTTCCTCTCAGCCAATCACAGACGGCCAGCGTCTGTTCTCCATCGCCGTCAGCAGAGTTCAACAT        | 87  |
| Consensus                | c t g agtgtctctgggtgttttctctcagccaatcacagacggccagcgctctgttctccatcgccgtcagcagagttcaacat                |     |
| GH-cds PiggyBac-gGH      | CTCCACCTGCTTGCTCAGAGACTCTTCTCCGACTTTGAGAGCACTCTGCAGACGGAGGAGCAGCGACAGCTCAACAAGATCTTCCTGCAGGACTTCTGTA  | 300 |
| GH-cds Transgenic oyster | CTCCACCTGCTTGCTCAGAGACTCTTCTCCGACTTTGAGAGCACTCTGCAGACGGAGGAGCAGCGACAGCTCAACAAGATCTTCCTGCAGGACTTCTGTA  | 187 |
| Consensus                | ctccacctgcttgctcagagactcttctccgactttgagagcactctgcagacggaggagcagcgacagctcaacaagatcttcctgcaggacttctgta  |     |
| GH-cds PiggyBac-gGH      | ACTCTGATTACATCATCAGCCCCATCGACAAGCACGAGACGCAGCGCAGCTCCGTGTTGAAGCTGTTGTCGATCTCCTATCGGTTGGTGGAGTCTCTGGGA | 400 |
| GH-cds Transgenic oyster | ACTCTGATTACATCATCAGCCCCATCGACAAGCACGAGACGCAGCGCAGCTCCGTGTTGAAGCTGTTGTCGATCTCCTATCGGTTGGTGGAGTCTCTGGGA | 287 |
| Consensus                | actctgattacatcatcagccccatcgacaagcacgagacgcagcgagctccgtgttgaagctgttgatctcctatcggttggaggagtcctggga      |     |
| GH-cds PiggyBac-gGH      | GTTCCCCAGTCGGTCCCTGTCCGGAGGTTCTGCTCCAGAAACCAGATTTCTCCAAACTGTCTGAATTGAAGACCGGGATCCTGCTGCTGATCAGGGCC    | 500 |
| GH-cds Transgenic oyster | GTTCCCCAGTCGGTCCCTGTCCGGAGGTTCTGCTCCAGAAACCAGATTTCTCCAAACTGTCTGAATTGAAGACCGGGATCCTGCTGCTGATCAGGGCC    | 387 |
| Consensus                | gttccccagtcggtccctgtccggagggttctgctccagaaaccagatttctccaaactgtctgaattgaagaccgggatcctgctgctgatcagggcc   |     |
| GH-cds PiggyBac-gGH      | AATCAGGACGGAGCGGAGCTCTTCCCTGACAGCTCCGCCCTCCAGCTGGCTCCTTATGGGAAGTATTATCAGAGTCTGGGCGCCGACGAGTCACTGCGAC  | 600 |
| GH-cds Transgenic oyster | AATCAGGACGGAGCGGAGCTCTTCCCTGACAGCTCCGCCCTCCAGCTGGCTCCTTATGGGAAGTATTATCAGAGTCTGGGCGCCGACGAGTCACTGCGAC  | 487 |
| Consensus                | aatcaggacggagcggagctcttccctgacagctccgccctccagctggctccttatgggaactattatcagagtcctgggcgccgacgagtcactgcgac |     |
| GH-cds PiggyBac-gGH      | GAACGTACGAAGTGTGGCTTGTTTCAAGAAAGACATGCACAAGGTGGAGACCTACCTGACGGTGGCTAAATGTCGACTCTCTCCTGAGGCCAACTGTAC   | 700 |
| GH-cds Transgenic oyster | GAACGTACGAAGTGTGGCTTGTTTCAAGAAAGACATGCACAAGGTGGAGACCTACCTGACGGTGGCTAAATGTCGACTCTCTCCTGAGGCCAACTGTAC   | 587 |
| Consensus                | gaacgtacgaactgtggcttggtttcaagaaagacatgcacaaggtggagacctacctgacggtggctaaatgtcgactctctcctgaggccaactgtac  |     |
| GH-cds PiggyBac-gGH      | CCTGTAGGCGGCCGCGAAGGATCTGCGATCGCTCCGGTGCCCGTCAGTGGGCAGAGCGCACATCGCCACAGTCCCCGAGAAGTTGGGGGGAGGGGTCTGG  | 800 |
| GH-cds Transgenic oyster | CCTGTAGGCGGCCCTTAAAACTATA.....                                                                        | 612 |
| Consensus                | cctgtaggcggcc aa t t                                                                                  |     |
