# Supplementary material
Source: Frontiers journal article supplement (https://www.frontiersin.org/articles/383323)
Supplement: Image_3.PDF [file Image_3.PDF]

Figure S3.

|                                                            |                                                                                                                                                                                                                                                                                                                          |             |
|------------------------------------------------------------|--------------------------------------------------------------------------------------------------------------------------------------------------------------------------------------------------------------------------------------------------------------------------------------------------------------------------|-------------|
| PiggyBac-gGH.<br>GFP-GH-cds Transgenic oyster<br>Consensus | TCAGAGTCTGGGCGCCGACGAGTCACTGCGACGAACGTACGAACTGCTGGCTTGTTCACGAAAGACATGCACAAAGGTGGAGACCTACCTGACGGTGGCT<br>.....CGGCTGGGTGACTACCTGACGGTGGCT<br>g tgg ctacctgacggtggt                                                                                                                                                        | 2300<br>27  |
| PiggyBac-gGH.<br>GFP-GH-cds Transgenic oyster<br>Consensus | AAATGTGCGACTCTCTCCTGAGGCCAACTGTACCCTGTAGGCGGCGCGCAAGGATCTGCGATCGCTCCGGTGCCCCGCAGTGGGCAGAGCGCACATCGCCC<br>AAATGTGCGACTCTCTCCTGAGGCCAACTGTACCCTGTAGGCGGCGCGCAAGGATCTGCGATCGCTCCGGTGCCCCGCAGTGGGCAGAGCGCACATCGCCC<br>aa tgtcgactctctcctgaggccaactgtaccctgtaggcgg c aaggatctgcatcgctccggtgcccgtcagtgggcagagcgacacatcgccc     | 2400<br>126 |
| PiggyBac-gGH.<br>GFP-GH-cds Transgenic oyster<br>Consensus | ACAGTCCCCGAGAAGTTGGGGGGAGGGGTCGGCAATTGAACGGGTGCCTAGAGAAGGTGGCGCGGGGTAACTGGGAAAGTGATGTCGTGTACTGGCTCC<br>ACAGTCCCCGAGAAGTTGGGGGGAGGGGTCGGCAATTGAACGGGTGCCTAGAGAAGGTGGCGCGGGGTAACTGGGAAAGTGATGTCGTGTACTGGCTCC<br>acagtccccgagaagttggggggaggggtcggcaattgaacgggtgcctagagaaggtggcgcggggtaaactgggaaagtgatgtcgtgtactggctcc       | 2500<br>226 |
| PiggyBac-gGH.<br>GFP-GH-cds Transgenic oyster<br>Consensus | GCCTTTTTCCCGAGGGTGGGGGAGAACCGTATATAAGTGCAGTAGTCGCCGTGAACGTTCTTTTTCGCAACGGGTTTGCCGCCAGAACACAGCTGAAGCT<br>GCCTTTTTCCCGAGGGTGGGGGAGAACCGTATATAAGTGCAGTAGTCGCCGTGAACGTTCTTTTTCGCAACGGGTTTGCCGCCAGAACACAGCTGAAGCT<br>gcctttttcccgaggggtgggggagaaaccgtatataaagtgcagtagtcgccgtgaacgttctttttcgcaacgggtttgcccgcagaaacacagctgaagct | 2600<br>326 |
| PiggyBac-gGH.<br>GFP-GH-cds Transgenic oyster<br>Consensus | TCGAGGGGCTCGCATCTCTCCTTCACGCGCCCGCCGCCCTACCTGAGGCCGCCATCCACGCCGTTGAGTGCCTTCTGCCGCTCCCGCCTGTGGTGCC<br>TCGAGGGGCTCGCATCTCTCCTTCACGCGCCCGCCGCCCTACCTGAGGCCGCCATCCACGCCGTTGAGTGCCTTCTGCCGCTCCCGCCTGTGGTGCC<br>tcgaggggctcgcatctctccttcacgcgcgcccgccgcctacctgaggcgcccatccacgcgggttgagtgcggttctgcgcctcccgccctgtggtgccc         | 2700<br>426 |
| PiggyBac-gGH.<br>GFP-GH-cds Transgenic oyster<br>Consensus | TCCTGAAGTGCCTCCGCCGCTAGGTAAGTTTAAAGCTCAGGTCGAGACCGGGCCTTTGTCCGGCGCTCCCTTGGAGCCTACCTAGACTCAGCCGGCTCT<br>TCCTGAAGTGCCTCCGCCGCTAGGTAAGTTTAAAGCTCAGGTCGAGACCGGGCCTTTGTCCGGCGCTCCCTTGGAGCCTACCTAGACTCAGCCGGCTCT<br>tcctgaagtgcgtccgcccgtctaggttaagtttaaagctcaggtcgagaccgggctttgtccggcgctcccttggagcctacctagactcagccggctct      | 2800<br>526 |
| PiggyBac-gGH.<br>GFP-GH-cds Transgenic oyster<br>Consensus | CCACGCTTTGCCTGACCCTGCTTGCTCAACTCTACGTCTTTGTTTCGTTTTCTGTTCTGCGCCGTTACAGATCCAAGCTGTGACCGGCGCCTACGCTAGA<br>CCACGCTTTGCCTGACCCTGCTTGCTCAACTCTACGTCTTTGTTTCGTTTTCTGTTCTGCGCCGTTACAGATCCAAGCTGTGACCGGCGCCTACGCTAGA<br>ccacgctttgcctgaccctgcttgctcaactctacgtctttgtttctgtttctgttctgcgcggttacagatccaagctgtgaccggcgccctacgctaga    | 2900<br>626 |
| PiggyBac-gGH.<br>GFP-GH-cds Transgenic oyster<br>Consensus | CGCCACCATGGAGAGCGACGAGAGCGGCCTGCCCGCCATGGAGATCGAGTGCCGCATCACCGGCACCCCTGAACGGCGTGGAGTTCGAGCTGGTGGGCGGC<br>CGCCACCATGGAGAGCGACGAGAGCGGCCTGCCCGCCATGGAGATCGAGTGCCGCATCACCGGCACCCCTGAACGGCGTGGAGTTCGAGCTGGTGGGCGGC<br>cgccaccatggagagcgacgagagcgccctgcccgccatggagatcgagtgcgcgatcaccggcaccttgaaaggcggtggagttcgagctggtggggcgcc | 3000<br>726 |
| PiggyBac-gGH.<br>GFP-GH-cds Transgenic oyster<br>Consensus | GGAGAGGGCACCCCCAAGCAGGGCCGCATGACCAACAAGATGAAGAGCACCAAGGCGCCCTGACCTTCAGCCCCCTACCTGCTGAGCCACGTGATGGGCT<br>GGAGAGGGCACCCCCAAGCAGGGCCGCATGACCAACAAGATGAAGAGCACCAAGGCGCCCTGACCTTCAGCCCCCTACCTGCTGAGCCACGTGATGGGCT<br>ggagagggcacccccaaagcagggccgcgatgaccaacaagatgaagagaccaaaggcgccctgaccttcagccctacctgctgagccacgtgatgggct     | 3100<br>826 |
| PiggyBac-gGH.<br>GFP-GH-cds Transgenic oyster<br>Consensus | ACGGCTTCTACCACTTCGGCACCTACCCAGCGGCTACGAGAACCCTTTCTGTCACGCCATCAACAACGGCGGCTACACCAACCCCGCTTCGAGTAG<br>ACGGCTTCTACCACTTCGGCACCTACCCAGCGGCTACGAGAACCCTTTCTGTCACGCCATCAACAACGGCGGCTACACCAATGGGGCTTCGAGTAG<br>acggcttctaccacttcggcacctaccccagcggtacgagaaccctt cctgcacgccatcaacaacggcggtacac caa g t ga a                       | 3198<br>926 |
